# Supplementary material for: Impact of COVID-19 on orthopaedic care: a call for nonoperative management
Source: PubMed Central journal article supplement — Ther Adv Musculoskelet Dis. 2020 Jun 19;12:1759720X20934276. doi: 10.1177/1759720X20934276 (PMC7307278; doi:10.1177/1759720x20934276), 2020-06-19
Supplement: COVID_Appendix_A.pdf [file COVID_Appendix_A.pdf]

## Appendix A: Systematic Search strategy

|   |                                                                                      |
|---|--------------------------------------------------------------------------------------|
| 1 | Pneumonia, Viral/ or Coronavirus Infections/ or <u>covid.mp.</u> or Betacoronavirus/ |
| 2 | Practice Guideline/ or Guideline/                                                    |
| 3 | healthcare <u>recommendation.mp.</u>                                                 |
| 4 | surg*.mp. or General Surgery/                                                        |
| 5 | 2 or 3                                                                               |
| 6 | 1 and 4 and 5                                                                        |
| 7 | remove duplicates from 6                                                             |
